# Supplementary material for: Evolution-Based Protein Engineering for Antifungal Peptide Improvement
Source: PubMed Central journal article supplement (PMC8557468; doi:10.1093/molbev/msab224), 2021-07-28
Supplement: msab224_supplementary_data.pdf [file msab224_supplementary_data.pdf]

## Evolution-Based Protein Engineering for Antifungal Peptide Improvement

Jing Gu, Noriyoshi Isozumi, Shouli Yuan, Ling Jin, Bin Gao, Shinya Ohki, and Shunyi Zhu

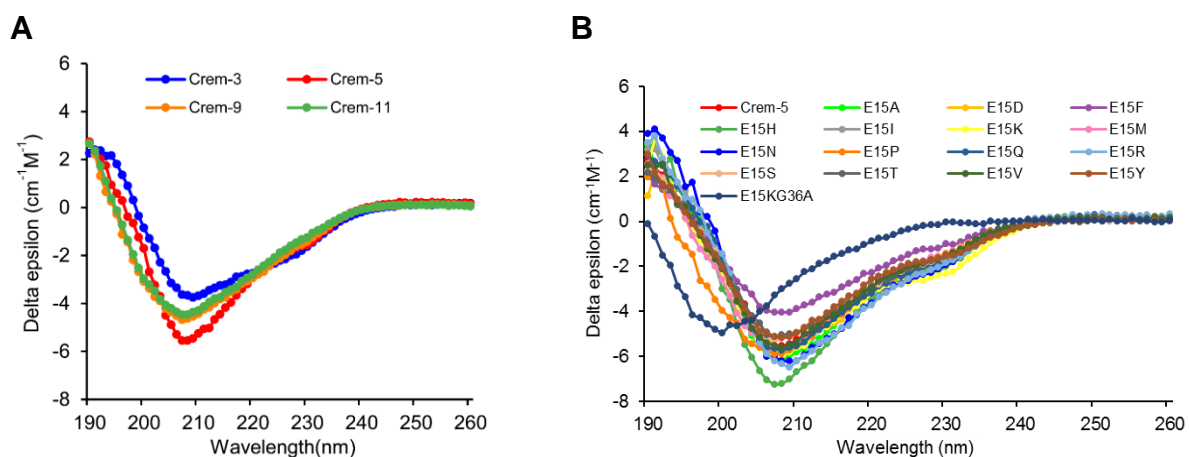

**FIG. S1. CD spectroscopy of recombinant peptides. (A) Crem-5 and its paralogues. (B) Crem-5 and its E15 mutants.**

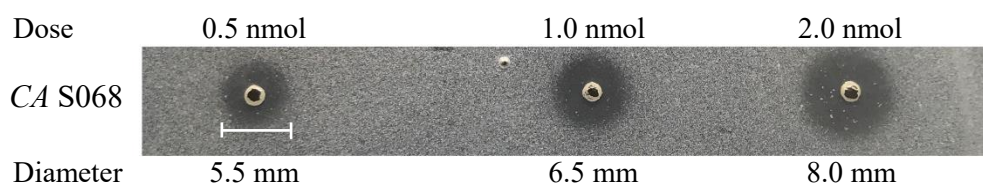

**FIG. S2. Inhibition-zone assay for assessing the antifungal activity of E15N (as a representative). Three different doses (0.5, 1.0 and 2.0 nmol) were used to produce dose-dependent inhibition zones in the CA S068 agar plate for  $C_L$  determination.**

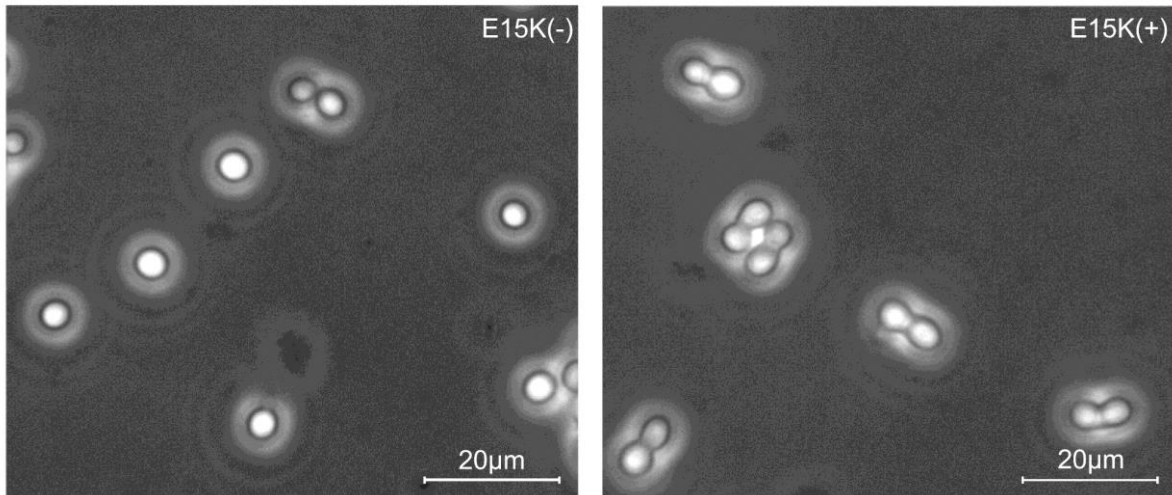

**FIG. S3. Phase contrast microscope observation of the effect of E15K on *C. albicans* B16.**

Freshly cultured cells were treated by  $5 \times C_L$  E15K and observed by the microscope Axio Observer A1 (Carl Zeiss Jena, Germany) after 6 h of incubation at 30°C. “+” and “-” indicate the presence and absence of E15K, respectively.

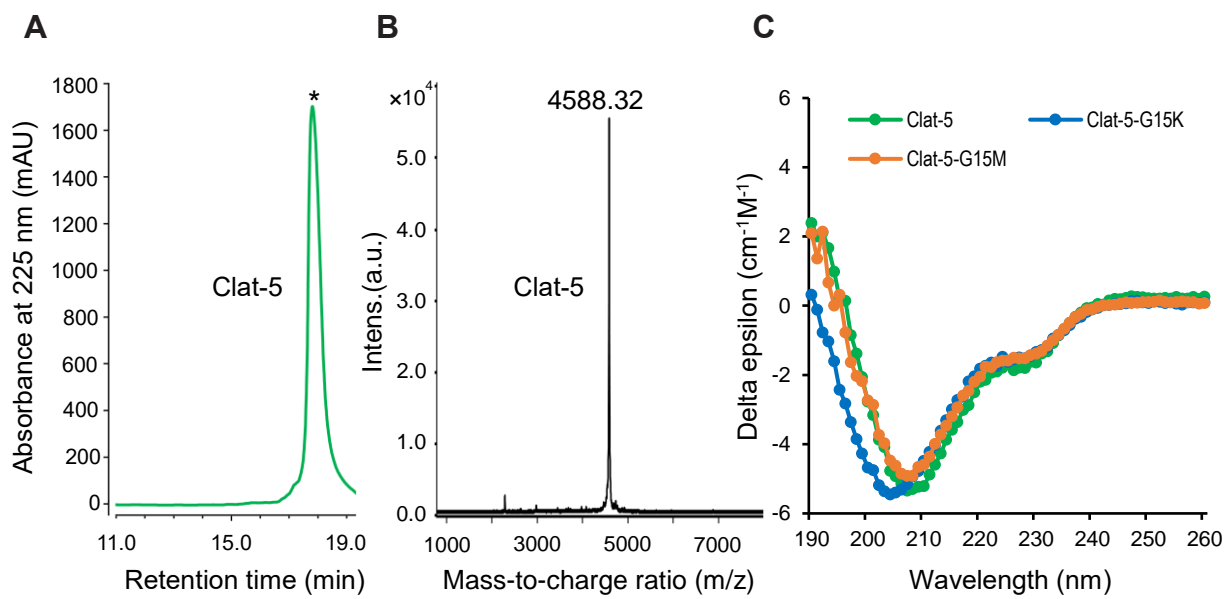

**FIG. S4. Expression, purification and characterization of Clat-5 and its mutants. (A)** RP-HPLC profiles recombinant peptides (Clat-5 as a representative). The product collected for analysis is marked by an asterisk. **(B)** MALDI-TOF MS of HPLC-purified recombinant Clat-5. **(C)** Comparison of CD spectra between Clat-5 and its G<sup>15</sup> mutants.

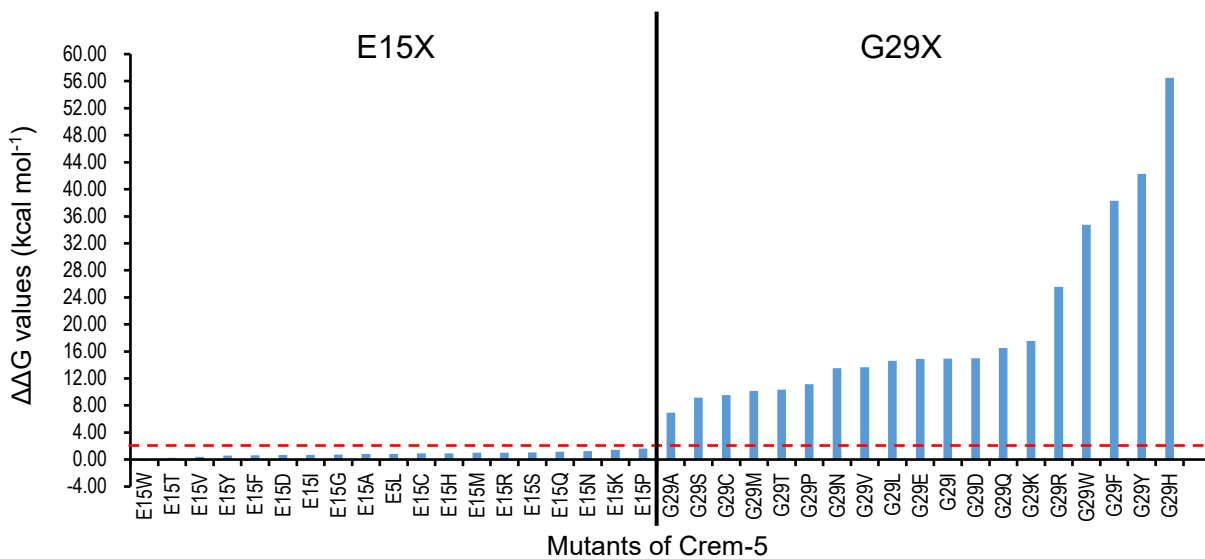

**FIG. S5.** The relative free energies of folding ( $\Delta\Delta G$ ) for Crem-5 mutants. The stabilities of Crem-5 and its mutants were predicted by FoldX version 4.0 (<http://foldx.embl.de/>). Mutations were performed with the <PositionScan> command and all options were set to default. The  $\Delta G$  is the difference in free energy between the unfolded and folded state of the protein ( $\Delta G = G_{\text{folded}} - G_{\text{unfolded}}$ ). The  $\Delta\Delta G$  is the difference of unfolding Gibbs free energy ( $\Delta\Delta G$ ) between mutant and WT ( $\Delta\Delta G = \Delta G_{\text{mutant}} - \Delta G_{\text{WT}}$ ), which is used to calculate how much a protein mutation affects the stability.  $\Delta\Delta G < +2$ , marked by a red dotted line, represents the threshold of significantly decreased stability.

**Table S1. Molecular weight of recombinant peptides**

| Peptides    | Experimental MW (Da)                     | Theoretical MW (Da) |
|-------------|------------------------------------------|---------------------|
| Crem-5      | 4674.81                                  | 4676.08             |
| K3A         | 4619.24                                  | 4618.98             |
| H6A         | 4608.80                                  | 4610.02             |
| H13A        | 4609.27                                  | 4610.02             |
| E15A        | 4617.47                                  | 4618.04             |
| E15C        | not designed                             |                     |
| E15D        | 4660.80                                  | 4662.05             |
| E15F        | 4691.31                                  | 4694.14             |
| E15G        | formation of insoluble inclusion bodies  |                     |
| E15H        | 4683.07                                  | 4684.11             |
| E15I        | 4659.20                                  | 4660.12             |
| E15K        | 4673.58                                  | 4675.14             |
| E15KG36A    | 4689.42                                  | 4689.17             |
| E15L        | non-specific cleavage of fusion proteins |                     |
| E15M        | 4676.31                                  | 4678.16             |
| E15N        | 4660.96                                  | 4661.07             |
| E15P        | 4643.21                                  | 4644.08             |
| E15Q        | 4674.80                                  | 4675.09             |
| E15R        | 4702.81                                  | 4703.15             |
| E15S        | 4631.20                                  | 4634.04             |
| E15T        | 4646.66                                  | 4648.07             |
| E15V        | 4644.10                                  | 4646.10             |
| E15W        | formation of insoluble inclusion bodies  |                     |
| E15Y        | 4708.10                                  | 4710.14             |
| R33A        | 4590.50                                  | 4590.97             |
| Clat-5      | 4588.32                                  | 4588.02             |
| Clat-5-G15K | 4659.23                                  | 4659.14             |
| Clat-5-G15M | 4661.75                                  | 4662.16             |

Note: Molecular weights of the recombinant peptides were determined by MALDI-TOF MS.

**Table S2. Lethal concentrations ( $C_L$ ) of Crem-5 and its mutants against fungi**

|        | $C_L$ ( $\mu\text{M}$ ) |                            |                 |
|--------|-------------------------|----------------------------|-----------------|
|        | <i>A. nidulans</i> A28  | <i>A. fumigatus</i> YJ-407 | <i>A. niger</i> |
| Crem-5 | W.A.                    | 15.45                      | 4.03            |
| K3A    | N.A.                    | N.A.                       | W.A.            |
| H6A    | W.A.                    | N.A.                       | W.A.            |
| H13A   | W.A.                    | W.A.                       | W.A.            |
| E15A   | 7.25                    | 7.70                       | 2.74            |
| R33A   | W.A.                    | N.A.                       | W.A.            |

Note: “W.A.”, weak activity, indicating that only very small inhibition zones were observed at 1.6 nmol peptide/well; “N.A.”, no activity, indicating that no inhibition zones were observed at 1.6 nmol peptide/well.

**Table S3. PCR primers used in this study**

| Name              | Sequence (5'→3')                                      |
|-------------------|-------------------------------------------------------|
| Crem-5-FP         | AT <u>GGATCC</u> GATGACGATGACAAGGATGTCAAAAGTGGACAC    |
| Crem-5-RP         | AT <u>GTCGAC</u> <i>TT</i> ATGTGTACACCAACAAGC         |
| K3A-FP            | <b>GCAAGTGGACACTACAAAGGACCA</b>                       |
| K3A/H6A-RP*       | GACATCCTTGTCATCGTCATCGGA                              |
| H6A-FP            | AAAAGTGGAG <b>CCTACAAAGGACCA</b>                      |
| H13A-FP           | <b>GCTGACGAGAATTGTAATGGCGTT</b>                       |
| H13A/E15X-RP*     | GTAGCATGGTCCTTTGTAGTGTCC                              |
| E15A-FP           | CATGAC <b>GCGA</b> AATTGTAATGGCGTT                    |
| E15D-FP           | CATGAC <b>GATA</b> AATTGTAATGGCGTT                    |
| E15F-FP           | CATGAC <b>TTCA</b> AATTGTAATGGCGTT                    |
| E15G-FP           | CATGAC <b>GCGG</b> AATTGTAATGGCGTT                    |
| E15H-FP           | CATGAC <b>CACA</b> AATTGTAATGGCGTT                    |
| E15I-FP           | CATGAC <b>ATTA</b> AATTGTAATGGCGTT                    |
| E15K-FP           | CATGAC <b>AAAA</b> AATTGTAATGGCGTT                    |
| E15KG36A-FP       | CGTTGGGGAG <b>GCTGCTT</b> GTTGGTGT                    |
| E15L-FP           | CATGAC <b>CTGA</b> AATTGTAATGGCGTT                    |
| E15M-FP           | CATGAC <b>ATGA</b> AATTGTAATGGCGTT                    |
| E15N-FP           | CATGAC <b>ACA</b> AATTGTAATGGCGTT                     |
| E15P-FP           | CATGAC <b>CCGA</b> AATTGTAATGGCGTT                    |
| E15Q-FP           | CATGAC <b>CAAA</b> AATTGTAATGGCGTT                    |
| E15R-FP           | CATGAC <b>CGTA</b> AATTGTAATGGCGTT                    |
| E15S-FP           | CATGAC <b>AGTA</b> AATTGTAATGGCGTT                    |
| E15T-FP           | CATGAC <b>ACGA</b> AATTGTAATGGCGTT                    |
| E15V-FP           | CATGAC <b>CTGA</b> AATTGTAATGGCGTT                    |
| E15W-FP           | CATGAC <b>TGGA</b> AATTGTAATGGCGTT                    |
| E15Y-FP           | CATGAC <b>TACA</b> AATTGTAATGGCGTT                    |
| R33A-FP           | <b>GCTTGGGGAGGAGCTT</b> GTTGGTGT                      |
| R33A/E15KG36A-RP* | GCTGCAGTGACCAGATTTGTAGCC                              |
| Clat-5-SUMO-FP    | <u>ACAGAGAACAGATTGGTGG</u> <u>AGACGACGACGACAAAGAC</u> |
| Clat-5-SUMO-RP    | <u>AGTGCGGCCGCAAGCTT</u> <u>GTTAGGTGTCGCACCAGCA</u>   |
| E15KG36A-SUMO-FP  | <u>ACAGAGAACAGATTGGTGG</u> <u>AGATGACGATGACAAGGAT</u> |
| E15KG36A-SUMO-RP  | <u>AGTGCGGCCGCAAGCTT</u> <u>GTTATGTGTACACCAACA</u>    |

Note: Restriction endonuclease sites (*Bam* HI and *Sal* I) and mutated nucleotides are underlined and boldfaced, respectively; and the stop codon is italicized. “\*”, reverse primers used to combine with respective forward primers to obtain corresponding mutants. Homologous arms are shadowed in grey.

**Table S4. Fungi used in this study**

| Fungus                              | Isolation site                               | Source                                                                    |
|-------------------------------------|----------------------------------------------|---------------------------------------------------------------------------|
| <i>Aspergillus niger</i>            | Polyvinyl chloride (PVC) plastic             | Center for Microbial Resources, Institute of Microbiology, Beijing, China |
| <i>Aspergillus nidulans</i> A28     | X-ray mutant of A4 → UV mutant of A26        | Prof. Shaojie Li, Institute of Microbiology, Beijing, China               |
| <i>Aspergillus fumigatus</i> YJ-407 | Soil                                         | Prof. Cheng Jin, Institute of Microbiology, Beijing, China                |
| <i>Candida albicans</i> 2.4138      | Pleural effusion from gastric cancer patient | Prof. Fengyan Bai, Institute of Microbiology, Beijing, China              |
| <i>Candida albicans</i> B16         | Vagina of Chinese women suffering from VVC   | Prof. Fengyan Bai, Institute of Microbiology, Beijing, China              |
| <i>Candida albicans</i> GD18        | Sputum                                       | Prof. Fengyan Bai, Institute of Microbiology, Beijing, China              |
| <i>Candida albicans</i> S068        | Vagina from asymptomatic women               | Prof. Fengyan Bai, Institute of Microbiology, Beijing, China              |

**Table S5. Input NMR data and structural statistics for the final 20 structures of Crem-5**

---

|                                                               |                 |
|---------------------------------------------------------------|-----------------|
| <b>Number of experimental restraints</b>                      |                 |
| Total Number of NOEs                                          | 135             |
| Short-range $ i - j  \leq 1$                                  | 56              |
| Medium range $1 <  i - j  < 5$                                | 24              |
| Long range $5 \leq  i - j $                                   | 25              |
| Hydrogen bond restraints                                      | 30              |
| <b>Structure statistics, 20 conformers</b>                    |                 |
| Average pairwise r.m.s.d.(Å)                                  |                 |
| Backbone atoms (residues 1-29)                                | $1.00 \pm 0.37$ |
| Heavy atoms (residues 1-29)                                   | $1.64 \pm 0.37$ |
| PROCHECK Ramachandran plot analysis (after the MD refinement) |                 |
| Residues in favored regions (%)                               | 66.0            |
| Residues in additionally allowed regions (%)                  | 26.0            |
| Residues in generously allowed regions (%)                    | 7.0             |
| Residues in disallowed regions (%)                            | 0.0             |

---



**Table S6. The accession numbers, origins, molecular sizes and masses of clatencins**

| Name                 | Accession No. (position)       | Origin                             | Size | Molecular mass (Da) |
|----------------------|--------------------------------|------------------------------------|------|---------------------|
| Clat-1               | NIPN01000032.1 (532630-532886) | <i>C. latens</i> PX534 scaffold31  | 42   | 4524.06             |
| Clat-3               | NIPN01000032.1 (534966-535204) | <i>C. latens</i> PX534 scaffold31  | 42   | 4495.92             |
| Clat-4               | NIPN01000032.1 (532361-532001) | <i>C. latens</i> PX534 scaffold31  | 42   | 4640.09             |
| Clat-5 <sup>a</sup>  | NIPN01000032.1 (535729-535491) | <i>C. latens</i> PX534 scaffold31  | 42   | 4588.02             |
| Clat-6               | NIPN01000032.1 (536021-#)      | <i>C. latens</i> PX534 scaffold31  | —    | —                   |
| Clat-7 <sup>a</sup>  | NIPN01000134.1 (190128-189891) | <i>C. latens</i> PX534 scaffold133 | 42   | 4546.98             |
| Clat-8 <sup>a</sup>  | NIPN01000134.1 (190536-190773) | <i>C. latens</i> PX534 scaffold133 | 42   | 4546.98             |
| Clat-9               | NIPN01000032.1 (534674-#)      | <i>C. latens</i> PX534 scaffold31  | —    | —                   |
| Clat-10 <sup>a</sup> | NIPN01000032.1 (536966-536728) | <i>C. latens</i> PX534 scaffold31  | 42   | 4541.95             |
| Clat-12              | NIPN01000032.1 (#-531650)      | <i>C. latens</i> PX534 scaffold31  | 42   | 4497.94             |
| Clat-13 <sup>a</sup> | NIPN01000032.1 (537344-537582) | <i>C. latens</i> PX534 scaffold31  | 42   | 4554.01             |
| Clat-15              | NIPN01000032.1 (538247-537996) | <i>C. latens</i> PX534 scaffold31  | 40   | 4606.30             |
| Clat-10 <sub>φ</sub> | NIPN01000032.1 (533729-533496) | <i>C. latens</i> PX534 scaffold31  | 42   | —                   |

Note: “#” represents positions undetermined in this study; “—” indicates data not available due to incomplete sequence or pseudogene (φ).<sup>a</sup>

Proteins currently annotated in the GenBank database as hypothetical proteins.
